# Supplementary material for: Assessment of Genetic Diversity of the “Acquaviva Red Onion” (Allium cepa L.) Apulian Landrace
Source: PubMed Central journal article supplement (PMC7076509; doi:10.3390/plants9020260), 2020-02-18
Supplement: plants-09-00260-s001.pdf [file plants-09-00260-s001.pdf]

# Assessment of Genetic Diversity of the 'Acquaviva red onion' (*Allium cepa* L.) Apulian Landrace

Supplementary Material

**Table S1.** Morphological descriptors related to bulb<sup>†</sup>, skin and flesh.

| Code  | Bulb shape<br>(1: elliptic; 2:<br>ovate; 3: broad<br>elliptic; 4: globe; 5:<br>broad ovate; 6:<br>broad obovate; 7:<br>rhomboid; 8: flat<br>globe 9: flat) | Bulb apical shape<br>(1: depressed; 2:<br>flat; 3: weak<br>prominent; 4:<br>smooth; 5: weak<br>pointed; 6: strong<br>pointed) | Bulb basal<br>shape<br>(1: depressed;<br>2: pointed; 3:<br>smooth; 4:<br>weak conical;<br>5: strong<br>conical) | Bulb<br>thickness<br>(cm) | CV* (%) | Bulb<br>width<br>(cm) | CV (%) | Thickness/Width | CV* (%) | Bulb skin colour<br>(1: white; 2: gray; 3:<br>green; 4: yellow; 5:<br>brown; 6: dark pink;<br>7: violet-red) | Skin colour<br>intensity<br>(3: weak; 5:<br>intermediate;<br>7: dark) | Bulb flesh colour<br>(1: white-light<br>pink; 2: dark<br>pink-violet; 3:<br>violet- red) |
|-------|------------------------------------------------------------------------------------------------------------------------------------------------------------|-------------------------------------------------------------------------------------------------------------------------------|-----------------------------------------------------------------------------------------------------------------|---------------------------|---------|-----------------------|--------|-----------------|---------|--------------------------------------------------------------------------------------------------------------|-----------------------------------------------------------------------|------------------------------------------------------------------------------------------|
| ARO1  | 8                                                                                                                                                          | 2                                                                                                                             | 2                                                                                                               | 4,5 C                     | 18,6    | 9,2 A                 | 24,3   | 0,5 C           | 14,5    | 6                                                                                                            | 7                                                                     | 2                                                                                        |
| ARO2  | 8                                                                                                                                                          | 2                                                                                                                             | 2                                                                                                               | 5,1 C                     | 18,6    | 10,0 A                | 16,8   | 0,5 C           | 29,4    | 6                                                                                                            | 7                                                                     | 2                                                                                        |
| ARO3  | 8                                                                                                                                                          | 2                                                                                                                             | 2                                                                                                               | 5,1 C                     | 17,0    | 10,3 A                | 23,3   | 0,5 C           | 17,0    | 6                                                                                                            | 7                                                                     | 2                                                                                        |
| ARO4  | 8                                                                                                                                                          | 2                                                                                                                             | 2                                                                                                               | 4,6 C                     | 15,9    | 9,8 A                 | 16,8   | 0,5 C           | 13,0    | 6                                                                                                            | 7                                                                     | 2                                                                                        |
| ARO5  | 8                                                                                                                                                          | 2                                                                                                                             | 2                                                                                                               | 5,1 C                     | 14,0    | 9,6 A                 | 18,7   | 0,5 C           | 27,7    | 6                                                                                                            | 7                                                                     | 2                                                                                        |
| ARO6  | 8                                                                                                                                                          | 2                                                                                                                             | 2                                                                                                               | 4,4 C                     | 9,6     | 9,1 A                 | 19,1   | 0,5 C           | 27,7    | 6                                                                                                            | 7                                                                     | 2                                                                                        |
| ARO7  | 8                                                                                                                                                          | 2                                                                                                                             | 2                                                                                                               | 5,5 C                     | 15,9    | 9,6 A                 | 19,8   | 0,6 C           | 18,2    | 6                                                                                                            | 7                                                                     | 2                                                                                        |
| ARO8  | 8                                                                                                                                                          | 2                                                                                                                             | 2                                                                                                               | 4,9 C                     | 15,6    | 10,9 A                | 17,3   | 0,5 C           | 19,2    | 6                                                                                                            | 7                                                                     | 2                                                                                        |
| ARO9  | 8                                                                                                                                                          | 2                                                                                                                             | 2                                                                                                               | 5,0 C                     | 14,4    | 10,8 A                | 22,7   | 0,5 C           | 17,5    | 6                                                                                                            | 7                                                                     | 2                                                                                        |
| ARO10 | 8                                                                                                                                                          | 2                                                                                                                             | 2                                                                                                               | 4,9 C                     | 20,2    | 9,8 A                 | 21,3   | 0,5 C           | 18,0    | 6                                                                                                            | 7                                                                     | 2                                                                                        |
| ARO11 | 8                                                                                                                                                          | 2                                                                                                                             | 2                                                                                                               | 5,4 C                     | 17,7    | 11,9 A                | 17,2   | 0,5 C           | 14,6    | 6                                                                                                            | 7                                                                     | 2                                                                                        |
| ARO12 | 8                                                                                                                                                          | 2                                                                                                                             | 2                                                                                                               | 5,3 C                     | 14,6    | 10,3 A                | 19,2   | 0,5 C           | 34,8    | 6                                                                                                            | 7                                                                     | 2                                                                                        |
| ARO13 | 8                                                                                                                                                          | 2                                                                                                                             | 2                                                                                                               | 4,4 C                     | 18,1    | 7,5 AB                | 24,0   | 0,6 C           | 15,2    | 6                                                                                                            | 7                                                                     | 2                                                                                        |
| MCO   | 6                                                                                                                                                          | 3                                                                                                                             | 4                                                                                                               | 7,6 B                     | 14,0    | 6,8 B                 | 24,2   | 1,1 B           | 22,3    | 5                                                                                                            | 5                                                                     | 1                                                                                        |
| TRO1  | 8                                                                                                                                                          | 2                                                                                                                             | 2                                                                                                               | 4,8 C                     | 17,9    | 8,9 A                 | 19,8   | 0,5 C           | 16,7    | 7                                                                                                            | 7                                                                     | 3                                                                                        |
| TRO2  | 7                                                                                                                                                          | 6                                                                                                                             | 6                                                                                                               | 11,6 A                    | 20,6    | 6,6 B                 | 20,7   | 1,7 A           | 18,3    | 7                                                                                                            | 7                                                                     | 3                                                                                        |

<sup>†</sup>Means with the same letters in uppercase or lowercase are not statistically different at 0,01P or 0,05P, respectively (SNK's Test); \* Coefficient of variation.

**Table S2.** Mean observed ( $H_o$ ) and expected ( $H_e$ ) heterozygosity and fixation index ( $F$ ) for each population considered in this study.

| ID Accession | $H_o$ | $H_e$ | $F$    |
|--------------|-------|-------|--------|
| ARO1         | 0.40  | 0.45  | 0.154  |
| ARO2         | 0.44  | 0.52  | 0.184  |
| ARO3         | 0.50  | 0.51  | 0.037  |
| ARO4         | 0.48  | 0.50  | 0.050  |
| ARO5         | 0.45  | 0.51  | 0.125  |
| ARO6         | 0.55  | 0.50  | -0.106 |
| ARO7         | 0.27  | 0.28  | 0.063  |
| ARO8         | 0.53  | 0.54  | 0.011  |
| ARO9         | 0.44  | 0.48  | 0.085  |
| ARO10        | 0.57  | 0.53  | -0.040 |
| ARO11        | 0.45  | 0.51  | 0.103  |
| ARO12        | 0.39  | 0.46  | 0.109  |
| ARO13        | 0.45  | 0.53  | 0.149  |
| TRO1         | 0.53  | 0.50  | -0.068 |
| TRO2         | 0.46  | 0.45  | 0.013  |
| MCO          | 0.51  | 0.50  | 0.001  |
| <b>Mean</b>  | 0.46  | 0.49  | 0.054  |

**Table S3.** Pairwise population  $\Phi_{iPT}$  values among all populations genotyped in the present study. Probability values ( $P$ ) are based on 999 permutations.

| Pairwise Comparisons |             | $\Phi_{iPT}$ | $P$   |
|----------------------|-------------|--------------|-------|
| Accession 1          | Accession 2 |              |       |
| ARO7                 | TRO2        | 0.468        | 0.001 |
| ARO7                 | TRO1        | 0.427        | 0.001 |
| ARO12                | TRO2        | 0.339        | 0.001 |
| ARO7                 | MCO         | 0.325        | 0.001 |
| ARO7                 | ARO11       | 0.323        | 0.001 |
| ARO7                 | ARO12       | 0.314        | 0.001 |
| ARO12                | TRO1        | 0.292        | 0.001 |
| ARO3                 | ARO7        | 0.275        | 0.001 |
| ARO4                 | ARO7        | 0.274        | 0.001 |
| ARO5                 | ARO7        | 0.266        | 0.001 |
| ARO2                 | ARO7        | 0.266        | 0.001 |
| ARO7                 | ARO13       | 0.252        | 0.001 |
| ARO12                | MCO         | 0.234        | 0.001 |
| ARO7                 | ARO10       | 0.230        | 0.001 |
| ARO1                 | MCO         | 0.229        | 0.001 |
| ARO9                 | TRO2        | 0.227        | 0.001 |
| TRO2                 | MCO         | 0.227        | 0.001 |
| ARO6                 | ARO7        | 0.224        | 0.001 |
| ARO1                 | ARO7        | 0.223        | 0.001 |
| ARO7                 | ARO9        | 0.223        | 0.001 |
| ARO1                 | TRO1        | 0.219        | 0.001 |

---

|       |       |       |       |
|-------|-------|-------|-------|
| ARO9  | TRO1  | 0.216 | 0.001 |
| ARO1  | TRO2  | 0.207 | 0.001 |
| ARO9  | MCO   | 0.200 | 0.001 |
| ARO8  | TRO1  | 0.197 | 0.001 |
| TRO1  | MCO   | 0.196 | 0.001 |
| ARO7  | ARO8  | 0.194 | 0.001 |
| ARO3  | ARO12 | 0.194 | 0.001 |
| ARO8  | TRO2  | 0.188 | 0.001 |
| ARO8  | MCO   | 0.186 | 0.001 |
| ARO8  | ARO12 | 0.175 | 0.001 |
| ARO5  | TRO1  | 0.174 | 0.001 |
| ARO6  | TRO2  | 0.173 | 0.001 |
| ARO3  | MCO   | 0.172 | 0.001 |
| ARO10 | ARO12 | 0.171 | 0.001 |
| ARO9  | ARO12 | 0.171 | 0.001 |
| ARO5  | ARO12 | 0.166 | 0.001 |
| ARO1  | ARO12 | 0.164 | 0.001 |
| ARO4  | ARO12 | 0.162 | 0.001 |
| ARO11 | MCO   | 0.159 | 0.001 |
| ARO13 | TRO2  | 0.157 | 0.001 |
| ARO6  | TRO1  | 0.156 | 0.001 |
| ARO5  | TRO2  | 0.154 | 0.001 |
| ARO6  | ARO12 | 0.149 | 0.001 |
| ARO3  | TRO1  | 0.145 | 0.001 |
| ARO3  | TRO2  | 0.145 | 0.001 |
| ARO6  | MCO   | 0.139 | 0.001 |
| ARO11 | ARO12 | 0.135 | 0.001 |
| ARO5  | MCO   | 0.134 | 0.001 |
| ARO4  | MCO   | 0.133 | 0.001 |
| ARO4  | TRO2  | 0.132 | 0.001 |
| ARO10 | TRO2  | 0.130 | 0.001 |
| ARO2  | TRO1  | 0.128 | 0.001 |
| ARO12 | ARO13 | 0.127 | 0.001 |
| ARO2  | TRO2  | 0.122 | 0.001 |
| ARO4  | TRO1  | 0.120 | 0.001 |
| ARO2  | MCO   | 0.116 | 0.001 |
| ARO1  | ARO13 | 0.116 | 0.001 |
| ARO9  | ARO13 | 0.115 | 0.001 |
| ARO8  | ARO11 | 0.115 | 0.001 |
| ARO10 | TRO1  | 0.113 | 0.001 |
| ARO11 | TRO2  | 0.111 | 0.001 |
| ARO9  | ARO11 | 0.111 | 0.001 |
| ARO2  | ARO12 | 0.107 | 0.001 |

---

---

|       |       |       |       |
|-------|-------|-------|-------|
| ARO8  | ARO13 | 0.102 | 0.001 |
| ARO13 | TRO1  | 0.100 | 0.001 |
| ARO13 | MCO   | 0.100 | 0.001 |
| ARO6  | ARO11 | 0.096 | 0.001 |
| ARO11 | TRO1  | 0.094 | 0.001 |
| ARO1  | ARO11 | 0.093 | 0.001 |
| ARO10 | MCO   | 0.089 | 0.001 |
| ARO3  | ARO9  | 0.084 | 0.001 |
| ARO4  | ARO8  | 0.081 | 0.001 |
| ARO3  | ARO13 | 0.074 | 0.001 |
| ARO2  | ARO3  | 0.074 | 0.001 |
| TRO1  | TRO2  | 0.070 | 0.001 |
| ARO1  | ARO3  | 0.067 | 0.001 |
| ARO10 | ARO11 | 0.065 | 0.001 |
| ARO5  | ARO13 | 0.063 | 0.001 |
| ARO4  | ARO9  | 0.087 | 0.002 |
| ARO6  | ARO9  | 0.086 | 0.002 |
| ARO3  | ARO8  | 0.081 | 0.002 |
| ARO5  | ARO8  | 0.069 | 0.002 |
| ARO9  | ARO10 | 0.064 | 0.002 |
| ARO3  | ARO11 | 0.060 | 0.002 |
| ARO2  | ARO6  | 0.059 | 0.002 |
| ARO5  | ARO11 | 0.055 | 0.002 |
| ARO4  | ARO11 | 0.049 | 0.002 |
| ARO4  | ARO13 | 0.048 | 0.002 |
| ARO6  | ARO13 | 0.086 | 0.003 |
| ARO5  | ARO9  | 0.061 | 0.004 |
| ARO2  | ARO9  | 0.059 | 0.004 |
| ARO2  | ARO13 | 0.044 | 0.006 |
| ARO1  | ARO6  | 0.059 | 0.007 |
| ARO1  | ARO2  | 0.044 | 0.009 |
| ARO1  | ARO10 | 0.048 | 0.010 |
| ARO3  | ARO10 | 0.047 | 0.010 |
| ARO2  | ARO8  | 0.043 | 0.010 |
| ARO2  | ARO11 | 0.035 | 0.012 |
| ARO5  | ARO6  | 0.057 | 0.014 |
| ARO8  | ARO9  | 0.047 | 0.016 |
| ARO1  | ARO5  | 0.044 | 0.017 |
| ARO5  | ARO10 | 0.037 | 0.017 |
| ARO1  | ARO4  | 0.042 | 0.023 |
| ARO2  | ARO4  | 0.030 | 0.032 |
| ARO8  | ARO10 | 0.034 | 0.039 |
| ARO10 | ARO13 | 0.025 | 0.039 |

---

|       |       |       |       |
|-------|-------|-------|-------|
| ARO1  | ARO8  | 0.033 | 0.047 |
| ARO6  | ARO10 | 0.034 | 0.052 |
| ARO1  | ARO9  | 0.028 | 0.054 |
| ARO4  | ARO6  | 0.033 | 0.055 |
| ARO3  | ARO6  | 0.039 | 0.059 |
| ARO6  | ARO8  | 0.029 | 0.081 |
| ARO11 | ARO13 | 0.025 | 0.082 |
| ARO3  | ARO5  | 0.019 | 0.108 |
| ARO2  | ARO5  | 0.020 | 0.112 |
| ARO4  | ARO5  | 0.017 | 0.150 |
| ARO4  | ARO10 | 0.014 | 0.174 |
| ARO3  | ARO4  | 0.004 | 0.366 |
| ARO2  | ARO10 | 0.002 | 0.441 |

**Table S4.** Features of the 16 EST-SSR and 21 genomic SSR primer pairs tested on the 16 populations of the present study.

| Locus   | Primer Sequences (5'→3')                                 | Repeat Motif                                   | Annealing Temp. (°C) | Reference               |
|---------|----------------------------------------------------------|------------------------------------------------|----------------------|-------------------------|
| ACM006  | GCAGTTCCTCCCTTGTA AAAATCA<br>GTGATGGATGAGTGGATGGA        | (CTC) <sub>7</sub>                             | 58                   | Kuhl et al.,<br>2004    |
| ACM024  | CCCCATTTTCTTCATTTTCTCA<br>TGCTGTTGCTGTTGTTGTTG           | (GCA) <sub>10</sub>                            | 58                   | Kuhl et al.,<br>2004    |
| ACM091* | TCTCCTCCTCTAACCAGCCA<br>GGTGTCCAGTTGAGCTTTC              | (TCT) <sub>10</sub>                            | 58                   | Kuhl et al.,<br>2004    |
| ACM101* | CCTTTGCTAACCAATCCGA<br>CTTGTTGAGAAGGAGGACGC              | (TCC) <sub>5</sub>                             | 58                   | Kuhl et al.,<br>2004    |
| ACM115  | TCCATCTATGCATCTGCCAC<br>CTATTCTTCCACTGGGGCAA             | (CAC) <sub>6</sub>                             | 58                   | Kuhl et al.,<br>2004    |
| ACM121  | GCAA ACTCATATAGTGCCGC<br>GAACCGATTCTACGAGCAGC            | (TAT) <sub>5</sub>                             | 58                   | Kuhl et al.,<br>2004    |
| ACM132* | ATGGGGCCTGGTAAGTTTTT<br>TGCACACCGTTTCCATTTTA             | (ACAT) <sub>14</sub> AC(CA<br>TG) <sub>4</sub> | 58                   | Kuhl et al.,<br>2004    |
| ACM134  | ACACACACAAGAGGGAAGGG<br>CACACACCCACACACATCAA             | (GA) <sub>8</sub>                              | 58                   | Kuhl et al.,<br>2004    |
| ACM138* | ACGGTTTGATGCACAAGATG<br>CCAACCAACAGTTGATACTGC            | (CTGC) <sub>11</sub>                           | 58                   | Kuhl et al.,<br>2004    |
| ACM147* | CAC TTTCCCGTCTAATCGACA<br>TTCCACAAATCAAAAACCA            | (CTC) <sub>5</sub>                             | 58                   | Kuhl et al.,<br>2004    |
| ACM151  | TGTCAGACAAGCAACTCCTCC<br>AGGTGAGGCTTAGATGGGGT            | (ACA) <sub>5</sub>                             | 58                   | Kuhl et al.,<br>2004    |
| ACM152* | TCCCAAGAGTCCAAGAATGG<br>TGTTCTCCCTTAAACAGTGCAA           | (CAG) <sub>8</sub>                             | 58                   | Kuhl et al.,<br>2004    |
| ACM227  | AGCAGCTCATT CAGCAAAA<br>GAGGTCGGAGAAGGAGGAGT             | (CAG) <sub>7</sub>                             | 58                   | Kuhl et al.,<br>2004    |
| ACM235* | ACGCATTTTCAAATGAAGGC<br>TGAGTCGGCACTCACCTATG             | (TTTG) <sub>4</sub>                            | 58                   | Kuhl et al.,<br>2004    |
| ACM238  | TGATAGCCAGTTGATTGCCGA<br>TTCCCCAGTACACACCTTCC            | (TTTG) <sub>4</sub>                            | 58                   | Kuhl et al.,<br>2004    |
| ACM303  | CGATGATTATAGATATTTCTGTTATGG<br>CATT CATAATCTCACAGTGGAAGG | (AC) <sub>8</sub>                              | 58                   | Kuhl et al.,<br>2004    |
| ACM359  | TCCATTTCACTTGGGTTTACAA<br>GCAAAGAATTA AATTGGAAGAAA       | (TATG) <sub>5</sub>                            | 58                   | Baldwin et al.,<br>2012 |
| ACM366  | TTTTGTCTAAAAATGGGCTGA                                    | (A) <sub>10</sub>                              | 58                   | Baldwin et al.,         |

|                |                                                                          |                                                                                                |          |                         |
|----------------|--------------------------------------------------------------------------|------------------------------------------------------------------------------------------------|----------|-------------------------|
|                | TGGGCTAATTCAGGGTTG                                                       |                                                                                                |          | 2012                    |
| <b>ACM373</b>  | AGGTAAAGAAGTTGAATGGTCTG<br>AAATGGACAAGTGGCATTCA                          | (AC) <sup>15</sup>                                                                             | 58       | Baldwin et al.,<br>2012 |
| <b>ACM376</b>  | TCCAAAACCCATAGGTTCCA<br>CAAGTTGGAAGGATAAGTTGTCTG                         | (AC) <sup>11</sup>                                                                             | 58       | Baldwin et al.,<br>2012 |
| <b>ACM385</b>  | AAGGATTTTATATTGATTTTGAATGAG<br>CCAATTTCAAAGACAGCATT                      | (AATA) <sup>5</sup>                                                                            | 58       | Baldwin et al.,<br>2012 |
| <b>ACM389</b>  | TGGAAAATGGAGCATGGTT<br>GGTAGTAGAGTGGGGCGTT                               | (AAT) <sup>5</sup>                                                                             | 58       | Baldwin et al.,<br>2012 |
| <b>ACM390</b>  | ACATACAAGATGGACACTCAACA<br>GTCAACAACCATGAGTCCG                           | (AT) <sup>10</sup> (GTAT) <sup>9</sup>                                                         | 58       | Baldwin et al.,<br>2012 |
| <b>ACM410</b>  | TGAGGCACGATGAAACCATA<br>TTTTTGTCCCACTCATCCTTT                            | (AT) <sup>6</sup>                                                                              | 58       | Baldwin et al.,<br>2012 |
| <b>ACM439</b>  | AAATGAAATACTGGAAAGAATAATTGA<br>ACCCTTAGCCATGAACCTCC                      | (TA) <sup>7</sup>                                                                              | 58       | Baldwin et al.,<br>2012 |
| <b>ACM443</b>  | TGGTGCTTGCTATGTTTTGC<br>CCCTAGGCCAAGCTTACTTGT                            | (TA) <sup>10</sup>                                                                             | 58       | Baldwin et al.,<br>2012 |
| <b>ACM446*</b> | TCAAGAATTCTGTTGCATCTTGT<br>AATAAGACCGCAGAAACGAAA                         | (TA) <sup>8</sup>                                                                              | 65 → 55* | Baldwin et al.,<br>2012 |
| <b>ACM449*</b> | GTAAAGGTGTAATAGGAATGAATCG<br>TACAAAGAAACACACGCGCT                        | (GT) <sup>7</sup>                                                                              | 65 → 55* | Baldwin et al.,<br>2012 |
| <b>ACM452</b>  | ATCGGGGGTTTGGAAATAAAA<br>ACGTGATAGGGTGGCTGAAC                            | (AT) <sup>7</sup>                                                                              | 58       | Baldwin et al.,<br>2012 |
| <b>ACM463*</b> | GCATATCGTTAATATTTTCATACTTCCA<br>GCTTCGCAACAGACACGTTA                     | (AC) <sup>8</sup>                                                                              | 58       | Baldwin et al.,<br>2012 |
| <b>ACM474</b>  | TACGGGGAATCAACAACCTGC<br>TACGCCGTTAGTAAGCGGAT                            | (AT) <sup>6</sup>                                                                              | 58       | Baldwin et al.,<br>2012 |
| <b>ACM477</b>  | TGCAATTGGAACCTTTGGTTTT<br>CCGTTCTCTATTTTGCAGC                            | (AT) <sup>6</sup>                                                                              | 58       | Baldwin et al.,<br>2012 |
| <b>ACM504*</b> | TCCCAAGAGTCCAAGAATGG<br>GTCGGTTTCAACATGAATACCAT                          | (GT) <sup>6</sup>                                                                              | 58       | Baldwin et al.,<br>2012 |
| <b>ACM509</b>  | CAATAATTAGCGGAAACAAAGAA<br>TCACCTTTGGAGTTTGGAGC                          | (TA) <sup>6</sup>                                                                              | 58       | Baldwin et al.,<br>2012 |
| <b>ACM520</b>  | CATGAAGCTGTTATTTGCATTTG<br>CCCTGCATGATGTTATTTTGC<br>GTACCCGAGACAAACCCCTT | (TA) <sup>7</sup>                                                                              | 58       | Baldwin et al.,<br>2012 |
| <b>ACM531</b>  | GAAGTTGCTGGGAGAGATGC                                                     | (TC) <sup>6</sup> ACCCCATC<br>TTCTTCTCCTCT<br>TCCTGTTTCTTC<br>TTCTCACTTTA(<br>T) <sup>10</sup> | 58       | Baldwin et al.,<br>2012 |
| <b>Gssr6</b>   | CAAGAGGCCAATCATGTGATAA<br>AGGCTTTGATGCTGTTTTGAT                          | (TAT) <sup>4</sup>                                                                             | 58       | Kim et al.,<br>2012     |

\* Primer pairs selected to genotype the 16 populations used in this study.

**Table S5.** Pairwise population matrix of Nei genetic distance among the 16 onion populations characterized in the present study.

| ARO1  | ARO2  | ARO3  | ARO4  | ARO5  | ARO6  | ARO7  | ARO8  | ARO9  | ARO10 | ARO11 | ARO12 | ARO13 | TRO1  | TRO2  | MCO   |              |
|-------|-------|-------|-------|-------|-------|-------|-------|-------|-------|-------|-------|-------|-------|-------|-------|--------------|
| 0.000 |       |       |       |       |       |       |       |       |       |       |       |       |       |       |       | <b>ARO1</b>  |
| 0.041 | 0.000 |       |       |       |       |       |       |       |       |       |       |       |       |       |       | <b>ARO2</b>  |
| 0.051 | 0.078 | 0.000 |       |       |       |       |       |       |       |       |       |       |       |       |       | <b>ARO3</b>  |
| 0.034 | 0.040 | 0.043 | 0.000 |       |       |       |       |       |       |       |       |       |       |       |       | <b>ARO4</b>  |
| 0.046 | 0.046 | 0.053 | 0.051 | 0.000 |       |       |       |       |       |       |       |       |       |       |       | <b>ARO5</b>  |
| 0.058 | 0.070 | 0.060 | 0.042 | 0.069 | 0.000 |       |       |       |       |       |       |       |       |       |       | <b>ARO6</b>  |
| 0.230 | 0.274 | 0.270 | 0.253 | 0.266 | 0.237 | 0.000 |       |       |       |       |       |       |       |       |       | <b>ARO7</b>  |
| 0.052 | 0.040 | 0.073 | 0.068 | 0.067 | 0.054 | 0.233 | 0.000 |       |       |       |       |       |       |       |       | <b>ARO8</b>  |
| 0.022 | 0.042 | 0.034 | 0.036 | 0.033 | 0.043 | 0.232 | 0.035 | 0.000 |       |       |       |       |       |       |       | <b>ARO9</b>  |
| 0.062 | 0.031 | 0.068 | 0.028 | 0.065 | 0.076 | 0.250 | 0.052 | 0.055 | 0.000 |       |       |       |       |       |       | <b>ARO10</b> |
| 0.050 | 0.060 | 0.037 | 0.046 | 0.063 | 0.072 | 0.288 | 0.072 | 0.039 | 0.066 | 0.000 |       |       |       |       |       | <b>ARO11</b> |
| 0.109 | 0.119 | 0.169 | 0.140 | 0.158 | 0.106 | 0.253 | 0.123 | 0.121 | 0.166 | 0.128 | 0.000 |       |       |       |       | <b>ARO12</b> |
| 0.087 | 0.072 | 0.086 | 0.064 | 0.084 | 0.094 | 0.221 | 0.081 | 0.067 | 0.046 | 0.049 | 0.125 | 0.000 |       |       |       | <b>ARO13</b> |
| 0.159 | 0.131 | 0.118 | 0.095 | 0.167 | 0.125 | 0.461 | 0.151 | 0.138 | 0.102 | 0.090 | 0.273 | 0.106 | 0.000 |       |       | <b>TRO1</b>  |
| 0.151 | 0.114 | 0.115 | 0.110 | 0.142 | 0.151 | 0.573 | 0.138 | 0.138 | 0.116 | 0.097 | 0.330 | 0.150 | 0.062 | 0.000 |       | <b>TRO2</b>  |
| 0.156 | 0.113 | 0.133 | 0.102 | 0.122 | 0.101 | 0.252 | 0.125 | 0.111 | 0.072 | 0.145 | 0.206 | 0.103 | 0.159 | 0.179 | 0.000 | <b>MCO</b>   |



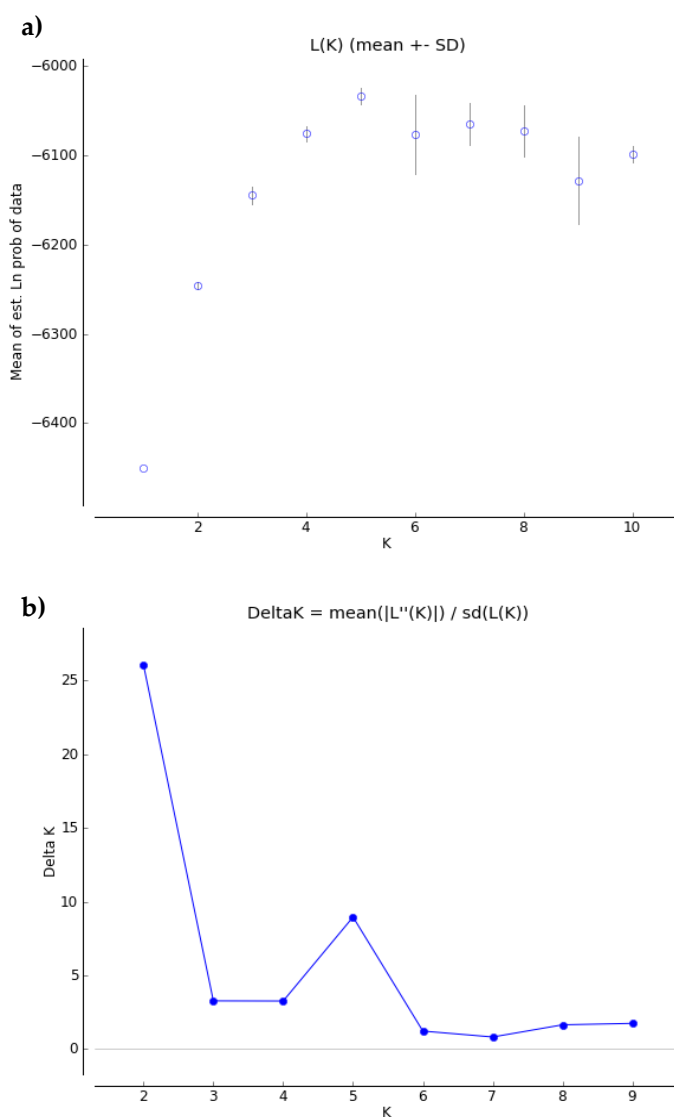

**Figure S1.** Post-hoc evaluation of STRUCTURE results. Mean likelihood  $L(K)$  and variance for 10 independent runs in each of the hypothetical assumed populations (1-10) (**a**) and detection of the most likely value of  $K$  (**b**). Two populations best define genetic variation in *Allium cepa* collection, although the next highest peak describes a deeper structuring in the collection, as confirmed both by the hierarchical clustering and by the principal coordinate analysis.
